# Supplementary material for: An ancillary-ligand strategy for the improvement of electrochemical sensing towards S-containing amines with ultralow detection limits
Source: Royal Society of Chemistry journal article supplement (doi:10.1039/d3ma00895a), 2023-11-28
Supplement: d3ma00895a1.pdf [file d3ma00895a1.pdf]

## Supporting Information

### **Ancillary-ligand-strategy for the improvement of electrochemical sensing towards S-containing amines with ultralow detection limit**

Teng Ma,<sup>a</sup> Yizhen Zhao,<sup>a</sup> Xiao Liu,<sup>a</sup> Xingyue He,<sup>a</sup> Bin Lei,<sup>a</sup> Xiaohang Qiu,<sup>\*a</sup> Jian-Gong Ma,<sup>\*a</sup> and Peng Cheng<sup>a</sup>

<sup>a</sup> Department of Chemistry, Key Laboratory of Advanced Energy Material Chemistry (MOE), Frontiers Science Center for New Organic Matter, and Renewable Energy Conversion and Storage Center (RECAST), College of Chemistry, Nankai University, Tianjin 300071, P. R. China

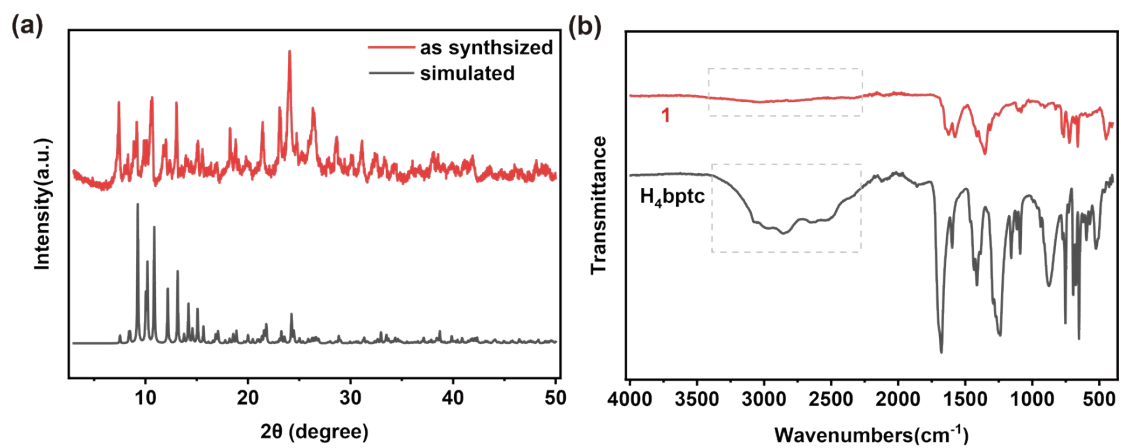

**Figure S1** (a) PXRD patterns of **1**. (b) FT-IR spectra of  $\text{H}_4\text{bptc}$  and **1**.

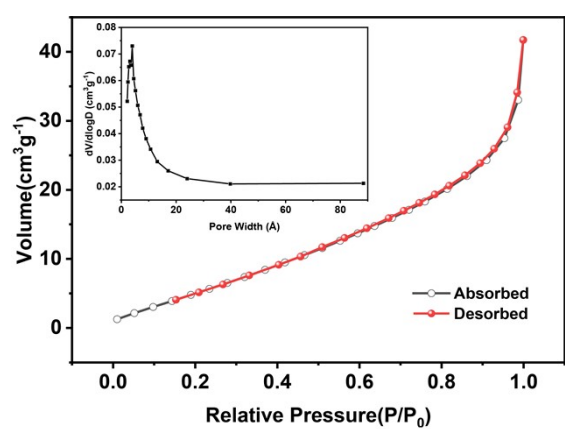

**Figure S2**  $\text{N}_2$  adsorption-desorption isotherms of **2** at 77 K (inset: the corresponding pore size distribution).

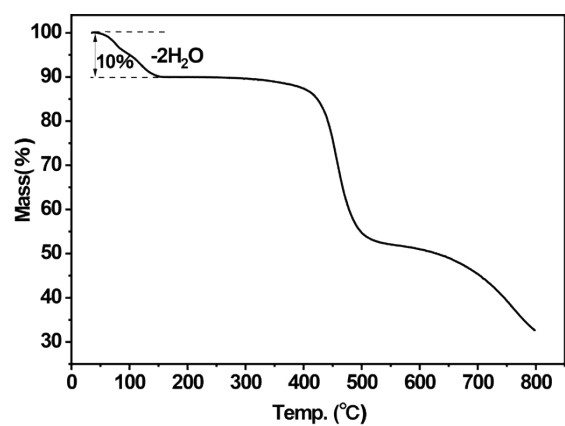

**Figure S3** TGA curve of **2**.

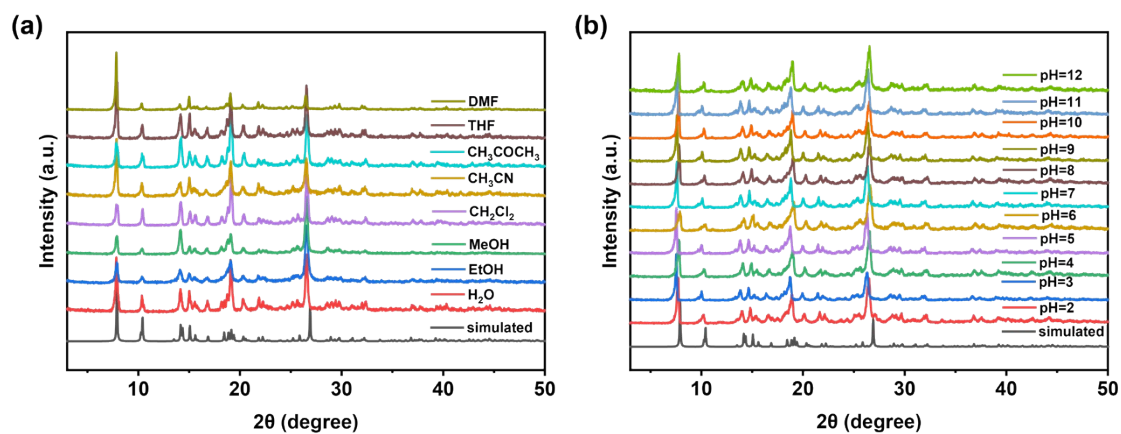

**Figure S4** (a) PXRD patterns of **2** after immersing in different solvents for 7d; (b) PXRD patterns of **2** after immersing in water, pH 2 ~ 12 for 7d.

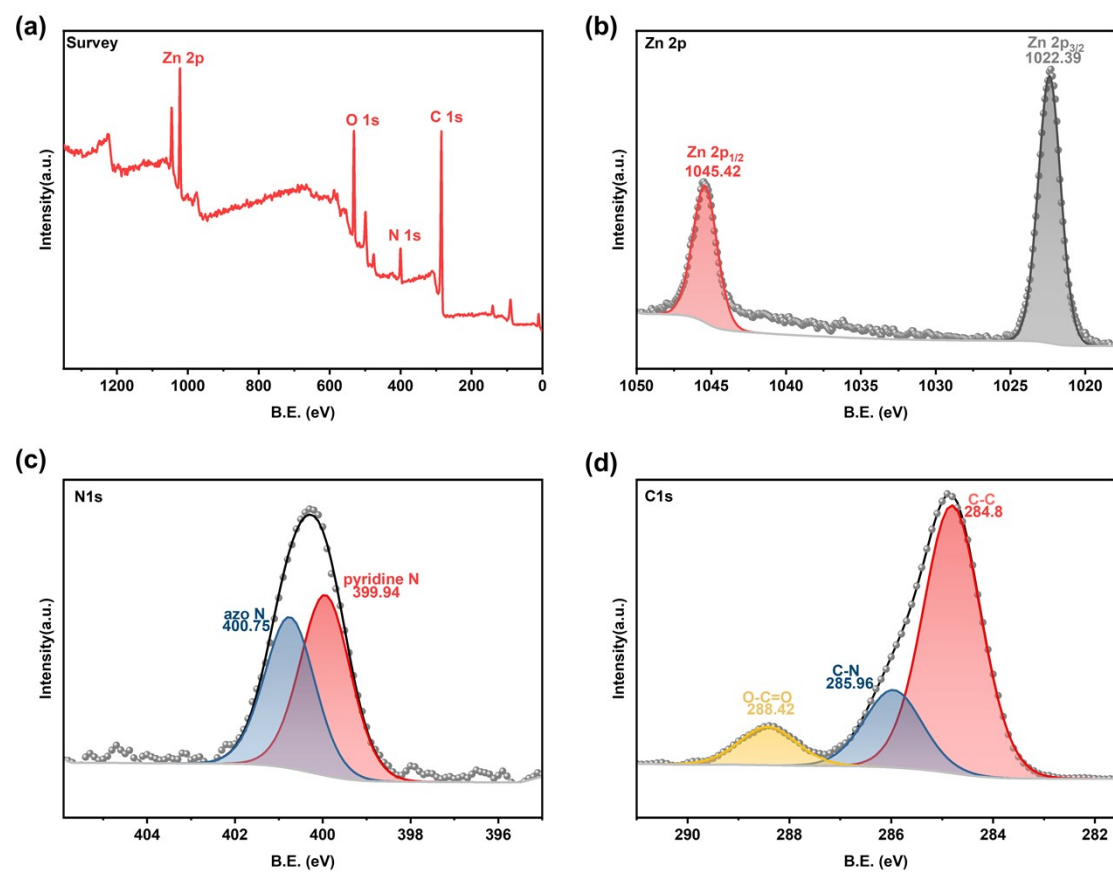

**Figure S5** XPS spectra of (a) survey of **2**; (b) Zn 2p; (c) N1s; (d) C1s.

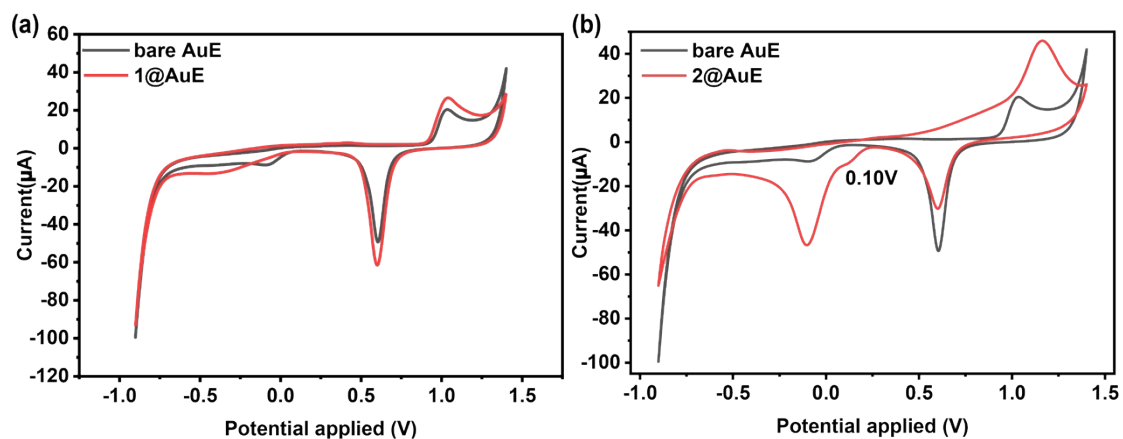

**Figure S6** CV characterization of the intrinsic electrochemical activity of **1** and **2** in ABS buffer solution at pH 4.4.

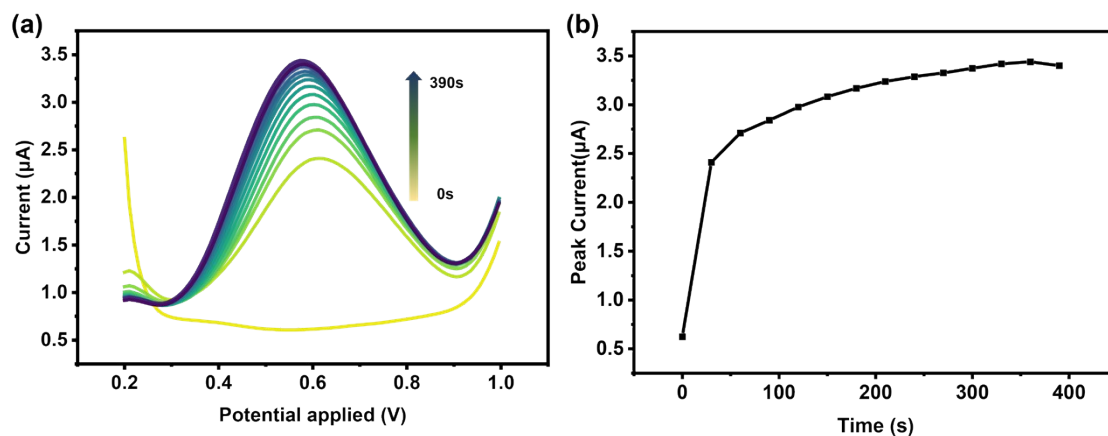

**Figure S7** (a) DPV curves of 20  $\mu\text{M}$  L-Met on **2@AuE** in ABS buffer with different accumulation time (0 ~ 390s) (b) The relationship between the oxidation currents of L-Met and accumulation time.

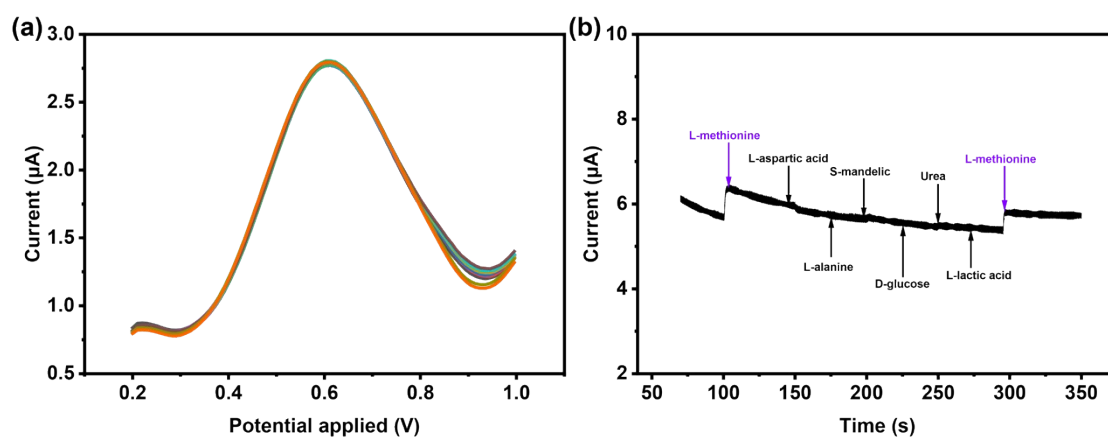

**Figure S8** (a) recyclability and (b) selectivity of **2@AuE** towards L-Met.

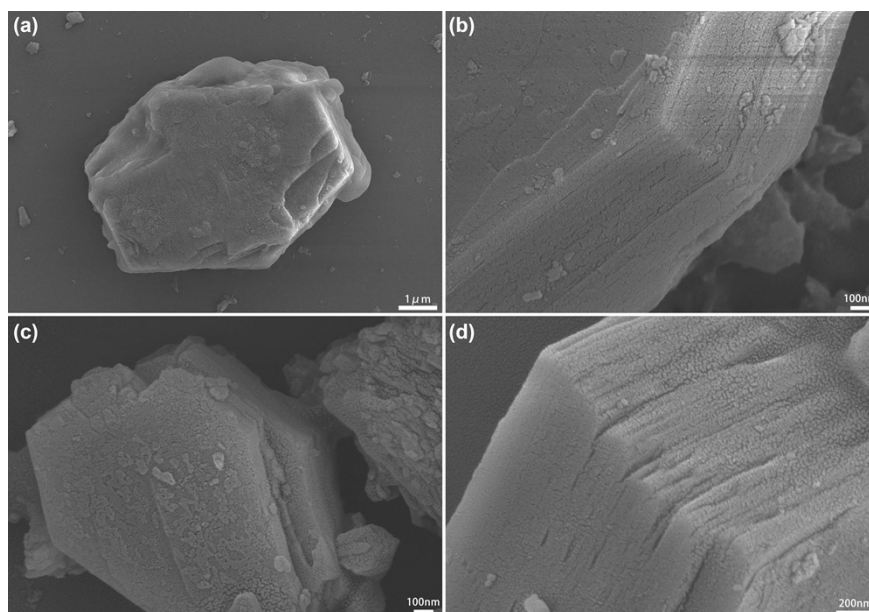

**Figure S9** The SEM images of **2** after electrochemical sensing(a, b) and 6 recycle sensing work(c, d) towards L-Met.

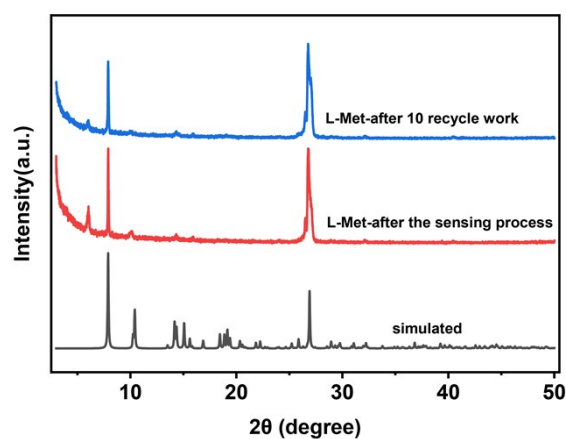

**Figure S10** PXRD patterns of **2** after the sensing process and 6 recycle work towards L-Met.

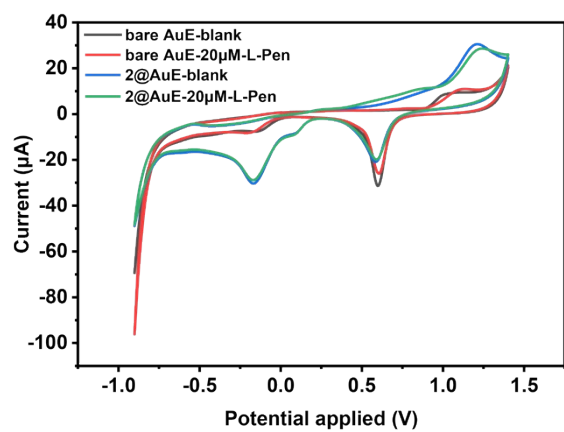

**Figure S11** Comparison of CV curves of **2@AuE** and bare AuE in the presence and absence of 20

$\mu\text{M}$  L-Pen in ABS buffer at pH 4.8.

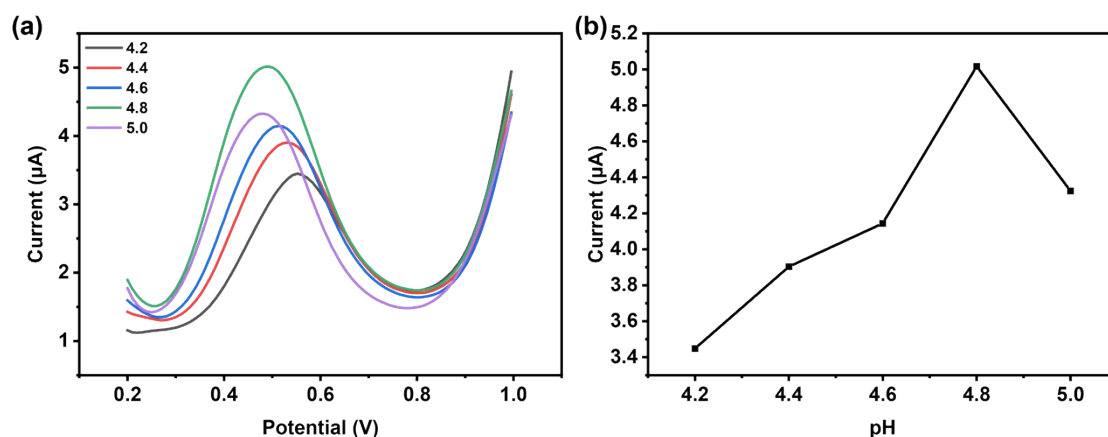

**Figure S12** (a) CV curves of 50  $\mu\text{M}$  L-Pen on 2@AuE in ABS buffer with different pH (4.2–5.0). (b) The relationship between the oxidation currents of L-Pen and pH values.

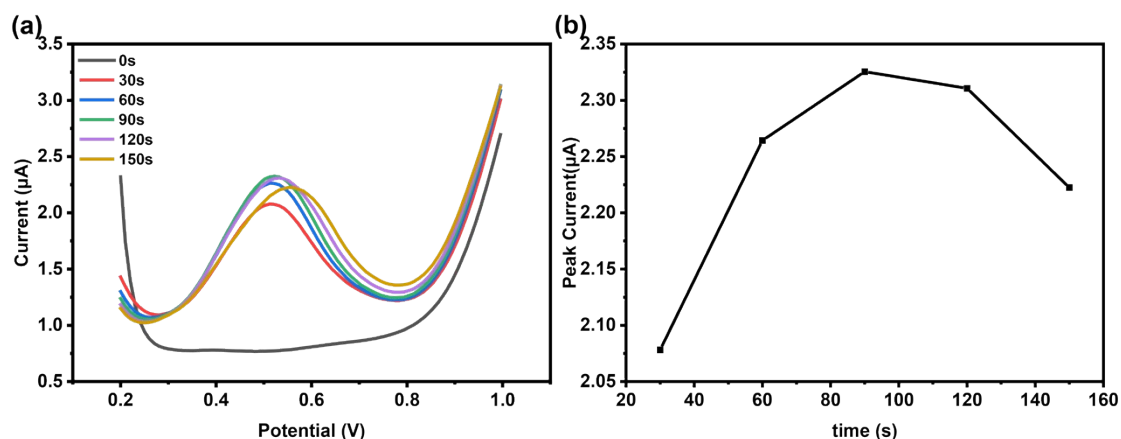

**Figure S13** (a) DPV curves of 50  $\mu\text{M}$  L-Pen on 2@AuE in ABS buffer with different accumulation time (0 ~ 150s) (b) The relationship between the oxidation currents of L-Pen and accumulation time.

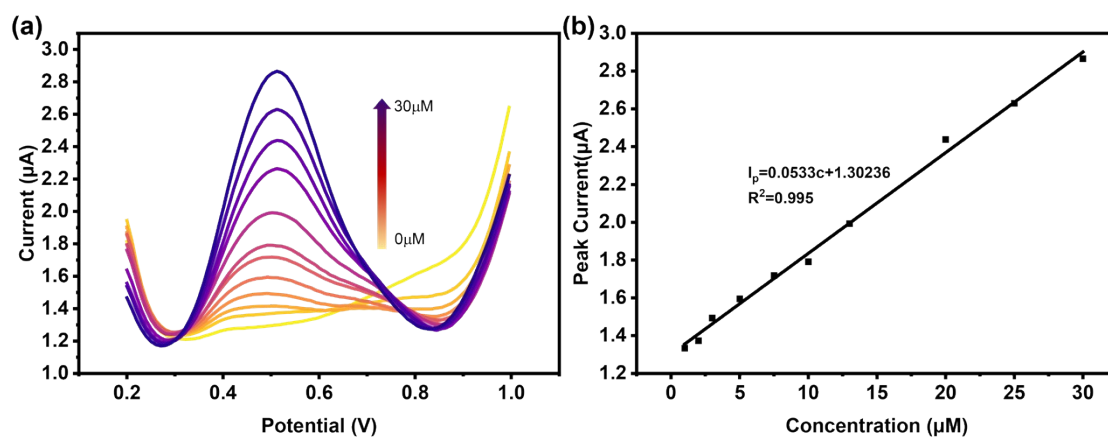

**Figure S14** (a) DPV curves of different concentrations of L-Pen on 2@AuE; (b) Linear relationship between the concentration of L-Pen and oxidation peak current.

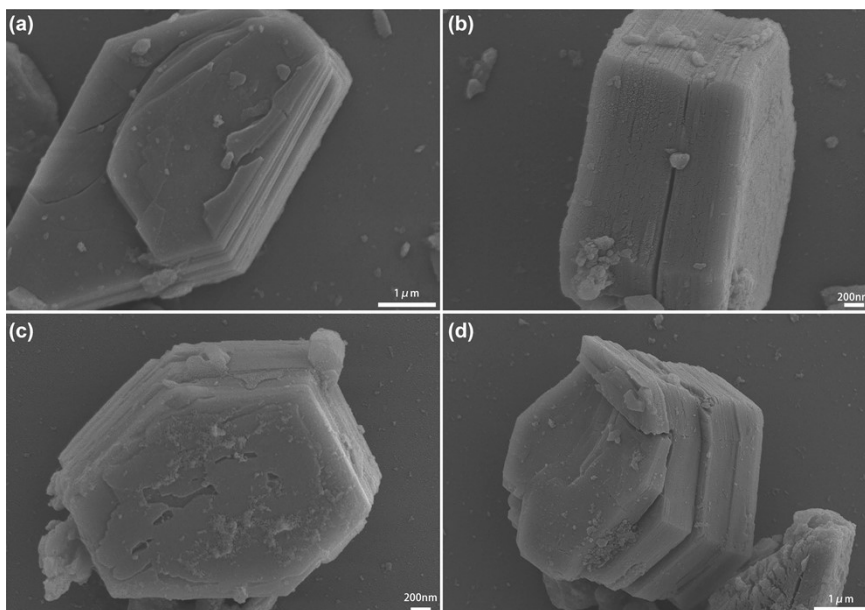

**Figure S15** The SEM images of **2** after electrochemical sensing(a, b) and 6 recycle sensing work(c, d) towards L-Pen.

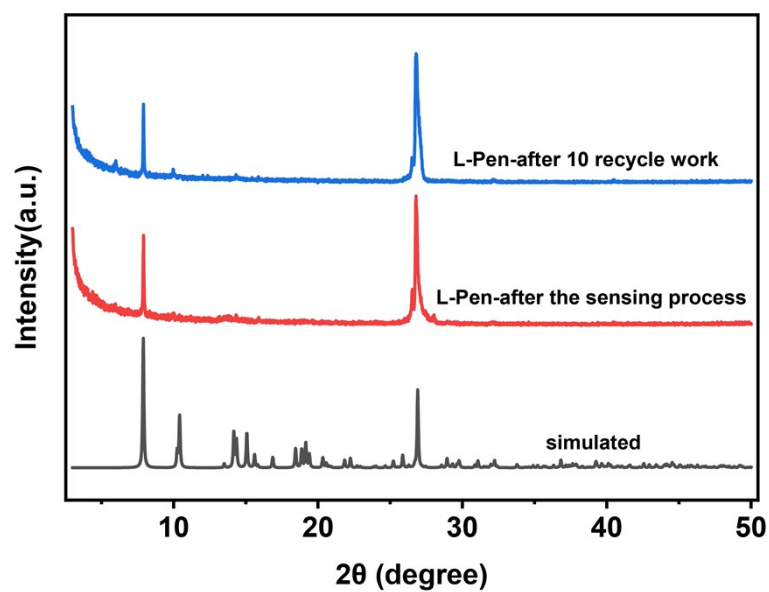

**Figure S16** PXRD patterns of **2** after the sensing process and 6 recycle work towards L-Pen.

**Table S1** Crystal data and structure refinement for **1**.

|                     |                             |
|---------------------|-----------------------------|
| Identification code | <b>1</b>                    |
| CCDC number         | 2297489                     |
| Empirical formula   | $C_{22}H_{22}N_2O_{11}Zn_2$ |
| Formula weight      | 621.15                      |
| Temperature/K       | 100.01(10)                  |
| Crystal system      | monoclinic                  |
| Space group         | $P2_1/c$                    |

|                                                       |                |
|-------------------------------------------------------|----------------|
| a/Å                                                   | 14.3500(2)     |
| b/Å                                                   | 12.8566(2)     |
| c/Å                                                   | 21.5209(2)     |
| $\alpha/^\circ$                                       | 90             |
| $\beta/^\circ$                                        | 125.0700(10)   |
| $\gamma/^\circ$                                       | 90             |
| Volume/Å <sup>3</sup>                                 | 3249.61(8)     |
| Z                                                     | 4              |
| $\rho_{\text{calc}}/\text{g/cm}^3$                    | 1.270          |
| $\mu/\text{mm}^{-1}$                                  | 2.248          |
| F(000)                                                | 1264.0         |
| Reflections collected                                 | 24541          |
| R <sub>int</sub>                                      | 0.0428         |
| GOF on F <sup>2</sup>                                 | 1.170          |
| R <sub>1</sub> , wR <sub>2</sub> [I > 2 $\sigma$ (I)] | 0.0583, 0.1401 |
| R <sub>1</sub> , wR <sub>2</sub> [all data]           | 0.0585, 0.1402 |
| Largest diff. peak/hole / e Å <sup>-3</sup>           | 1.37/-0.60     |

**Table S2** Crystal data and structure refinement for **2**.

|                                                       |                                                                                |
|-------------------------------------------------------|--------------------------------------------------------------------------------|
| dentification code                                    | <b>2</b>                                                                       |
| CCDC number                                           | 2297488                                                                        |
| Empirical formula                                     | C <sub>26</sub> H <sub>18</sub> N <sub>4</sub> O <sub>10</sub> Zn <sub>2</sub> |
| Formula weight                                        | 677.18                                                                         |
| Temperature/K                                         | 133.6(3)                                                                       |
| Crystal system                                        | triclinic                                                                      |
| Space group                                           | p $\bar{1}$                                                                    |
| a/Å                                                   | 6.9201(15)                                                                     |
| b/Å                                                   | 9.6208(11)                                                                     |
| c/Å                                                   | 12.0479(10)                                                                    |
| $\alpha/^\circ$                                       | 109.196(9)                                                                     |
| $\beta/^\circ$                                        | 94.448(12)                                                                     |
| $\gamma/^\circ$                                       | 105.662(14)                                                                    |
| Volume/Å <sup>3</sup>                                 | 717.1(2)                                                                       |
| Z                                                     | 1                                                                              |
| $\rho_{\text{calc}}/\text{g/cm}^3$                    | 1.568                                                                          |
| $\mu/\text{mm}^{-1}$                                  | 1.734                                                                          |
| F(000)                                                | 342.0                                                                          |
| Reflections collected                                 | 5191                                                                           |
| R <sub>int</sub>                                      | 0.0677                                                                         |
| GOF on F <sup>2</sup>                                 | 0.973                                                                          |
| R <sub>1</sub> , wR <sub>2</sub> [I > 2 $\sigma$ (I)] | 0.0743, 0.1199                                                                 |
| R <sub>1</sub> , wR <sub>2</sub> [all data]           | 0.1387, 0.1506                                                                 |
| Largest diff. peak/hole / e Å <sup>-3</sup>           | 0.67/-0.83                                                                     |

**Table S3** The comparison of **2@AuE** with other electrode for electrochemical sensing of L-Met.

| Working Electrode                      | Linear range ( $\mu\text{M}$ )              | Limit of detection ( $\mu\text{M}$ ) | Sensitivity ( $\mu\text{A mM}^{-1} \text{cm}^{-2}$ )                                                                                                         | Ref          |
|----------------------------------------|---------------------------------------------|--------------------------------------|--------------------------------------------------------------------------------------------------------------------------------------------------------------|--------------|
| <b>2</b>                               | 0.05~1 $\mu\text{M}$ and 1~30 $\mu\text{M}$ | $6.4 \times 10^{-6} \mu\text{M}$     | 3.637 $\mu\text{A } \mu\text{M}^{-1} \text{cm}^{-2}$ (0.05~1 $\mu\text{M}$ ) and 10.706 $\mu\text{A } \mu\text{M}^{-1} \text{cm}^{-2}$ (1~30 $\mu\text{M}$ ) | This work    |
| 3D PLA-GNaOH-EC electrode              | 5.0 $\mu\text{M}$ – 3000 $\mu\text{M}$      | 1.39 $\mu\text{M}$                   | 0.176 $\mu\text{A } \mu\text{mol}^{-1}$                                                                                                                      | <sup>1</sup> |
| GC/GCN-S electrode                     | 0.1 $\mu\text{M}$ to 200 $\mu\text{M}$      | $3.2 \times 10^{-4} \mu\text{M}$     | 1.16 $\mu\text{A } \mu\text{M}^{-1} \text{cm}^{-2}$                                                                                                          | <sup>2</sup> |
| $\text{Mn}_2\text{O}_3/\text{SPCE}$    | 1.0 to 6.1 $\mu\text{M}$                    | $1.0 \times 10^{-3} \mu\text{M}$     | 6.036 ( $\pm 0.002$ ) $\mu\text{A } \mu\text{M}^{-1} \text{cm}^{-2}$                                                                                         | <sup>3</sup> |
| $\text{MnO}_2@\text{MnCeO}$            | 1000–10000 and 1–750 $\mu\text{M}$          | 0.16 $\mu\text{M}$                   | -                                                                                                                                                            | <sup>4</sup> |
| AgO modified graphite pencil electrode | 60 $\mu\text{M}$ - 500 $\mu\text{M}$        | 0.42 $\mu\text{M}$                   | 4.23 $\mu\text{A } \mu\text{M}^{-1} \text{cm}^{-2}$                                                                                                          | <sup>5</sup> |

**Reference:**

1. C. Kalinke, N. V. Neumsteir, P. Roberto de Oliveira, B. C. Janegitz and J. A. Bonacin, *Anal. Chim. Acta*, 2021, **1142**, 135-142.
2. A. Ajith and S. A. John, *Electroanal*, 2023, **35**, e202200063.
3. R. Sasikumar, T. W. Chen, S. M. Chen, S. P. Rwei and M. C. Yu, *Int. J. Electrochem. Sci.*, 2018, **13**, 4561-4574.
4. M. Rashedi and T. Alizadeh, *J. Electrochem. Soc.*, 2023, **170**, 017502.
5. N. A. Odewunmi, A. N. Kawde and M. Ibrahim, *Sens. Actuators, B*, 2019, **281**, 765-773.
